# Supplementary material for: Angiogenic Potential of Human Neonatal Foreskin Stromal Cells in the Chick Embryo Chorioallantoic Membrane Model
Source: Hindawi journal article supplement (doi:10.1155/2015/257019), 2015-01-01
Supplement: f1 [file 257019.f1.pdf]

# Experiment Negative Controls

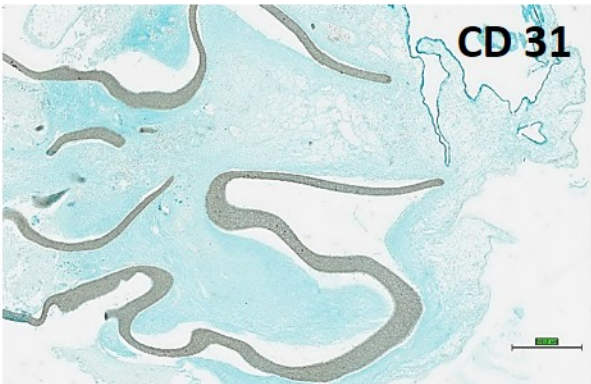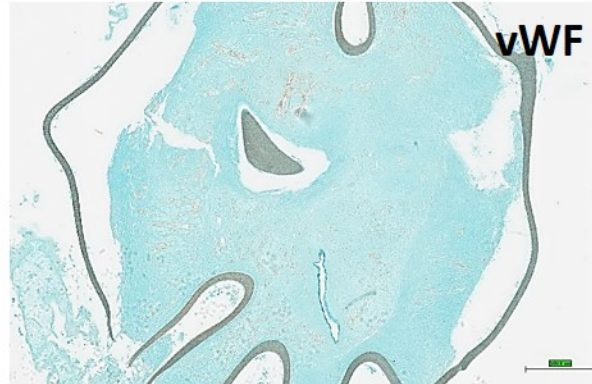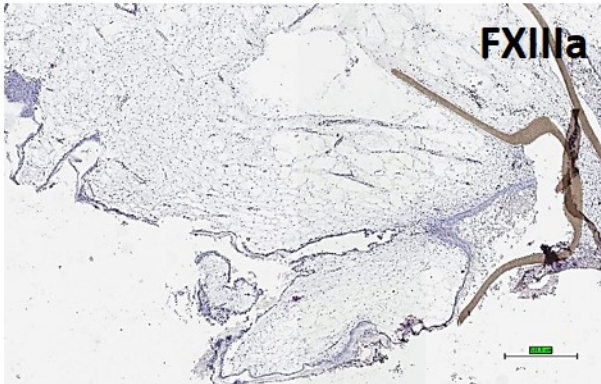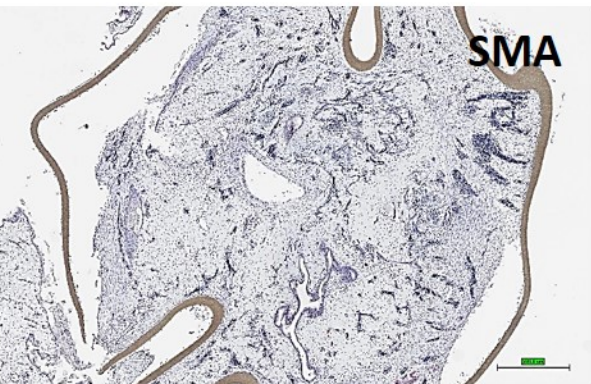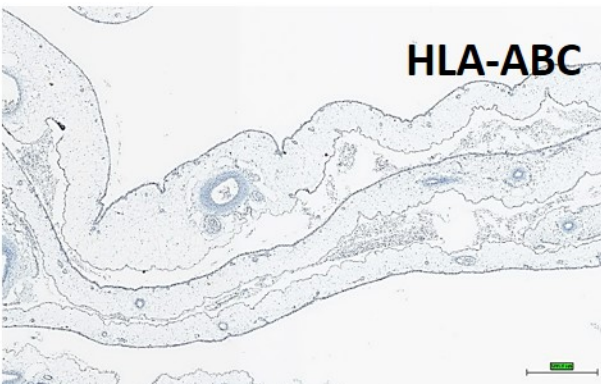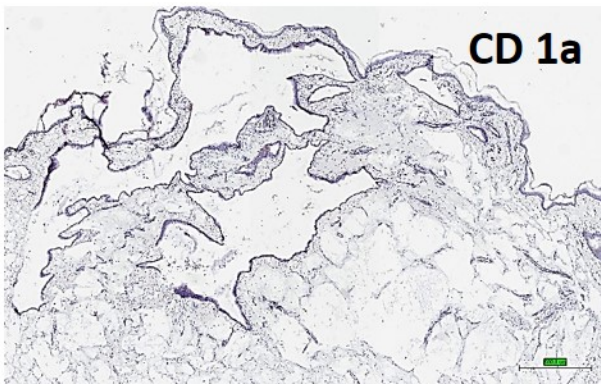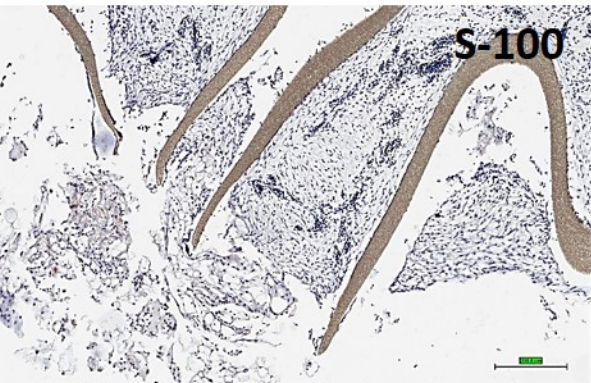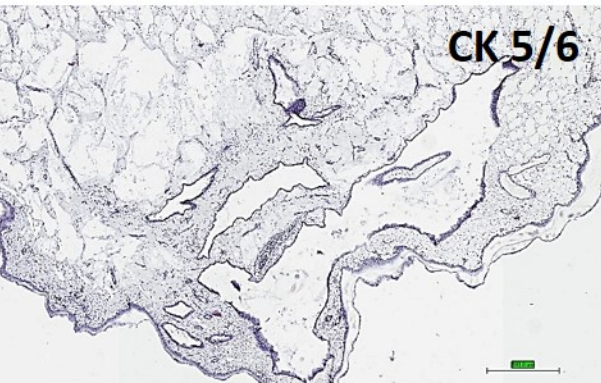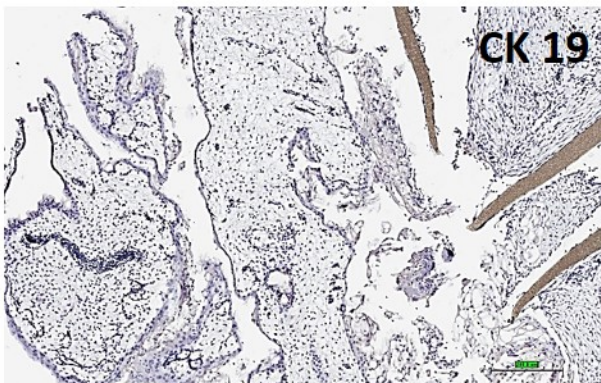

Sup Fig 1

# Experiment Positive Controls

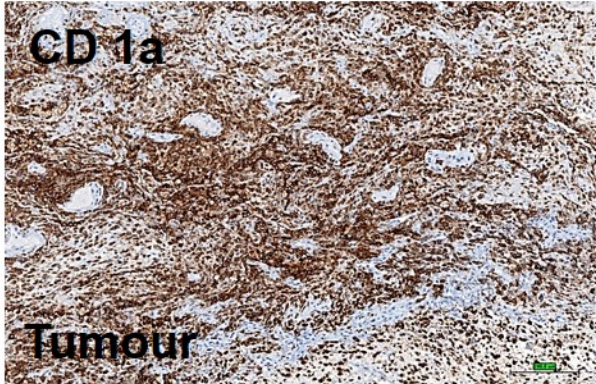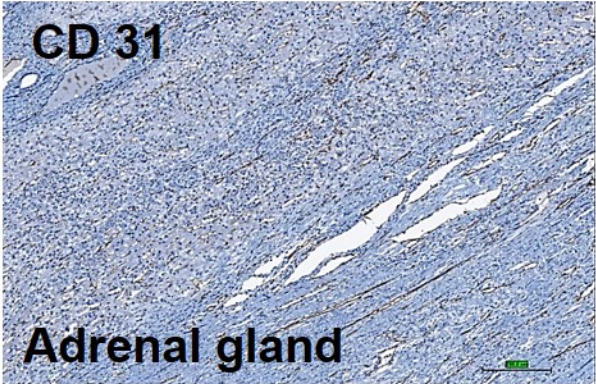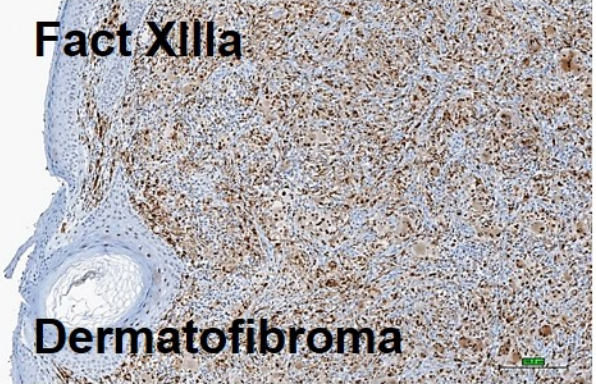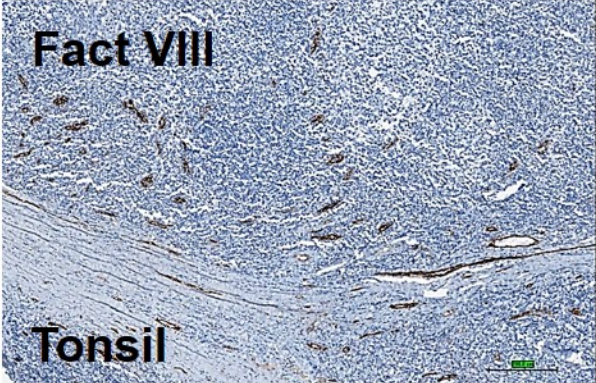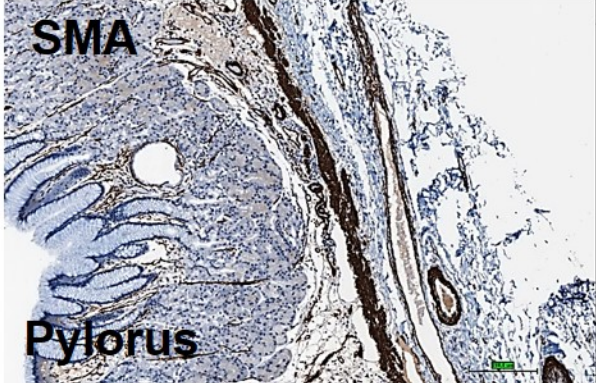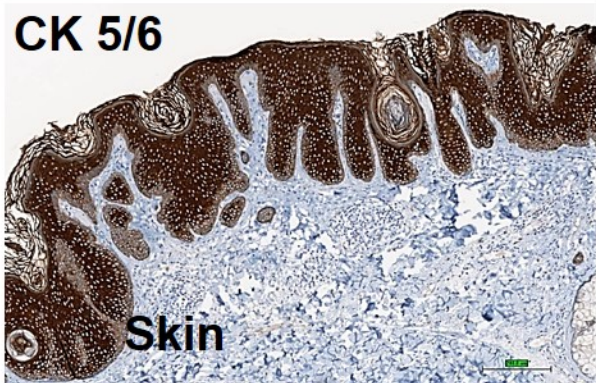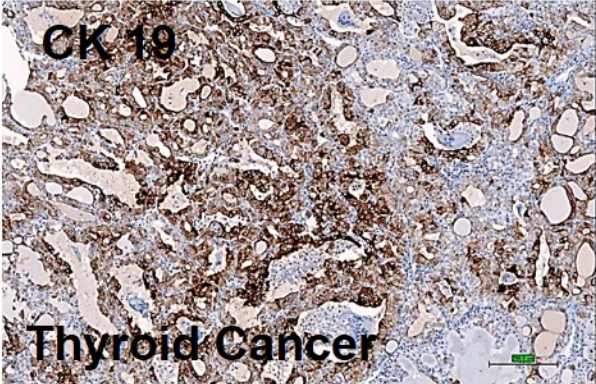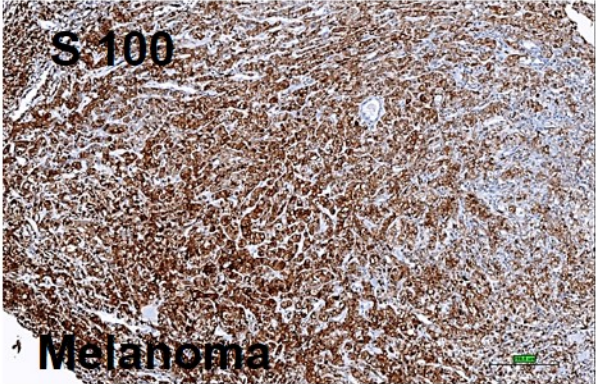

Sup Fig 2
